# Supplementary material for: Plant species richness regulates soil respiration through changes in productivity
Source: PubMed Central journal article supplement — Oecologia. 2010 Feb 19;163(3):805–13. doi: 10.1007/s00442-010-1569-5 (PMC2886140; doi:10.1007/s00442-010-1569-5), 2010-02-19

Dias ATC, van Ruijven J, Berendse F. Plant species richness regulates soil respiration through changes in productivity. *Oecologia*.

**Electronic Supplemental Material 1** Scatterplots and correlation matrix for the variables included in the path models. Pearson correlation coefficients are shown (\* $P < 0.05$ ; \*\* $P < 0.01$ ). All variables were Log-transformed.

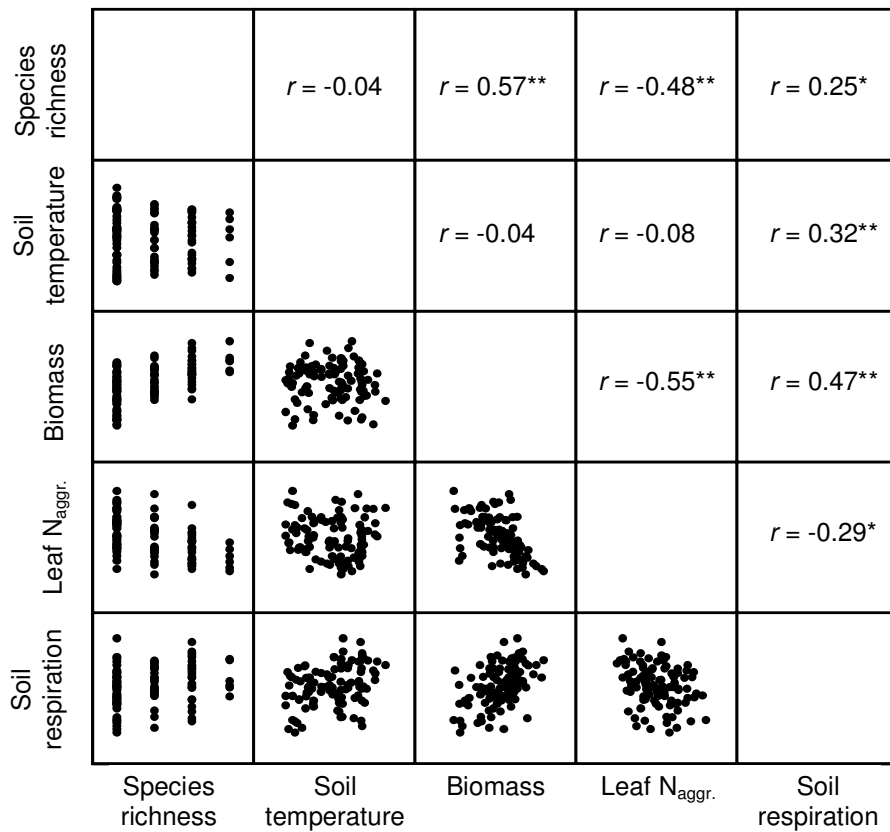

Supplement: 442_2010_1569_MOESM1_ESM.pdf [file 442_2010_1569_MOESM1_ESM.pdf]
